# Supplementary material for: A Comparison of Factors Associated with Breast Cancer Stage at Diagnosis and 2-year Overall Survival Pre and During Covid-19 Periods in Johannesburg, South Africa
Source: Research Square preprint supplement (doi:10.21203/rs.3.rs-8707717/v1), 2026-02-11
Supplement: Supplementary file 1 [file 9a5bfa9dea4404254ef8be7d.docx]

**A Comparison of Factors Associated with Breast Cancer Stage at Diagnosis and 2-year Overall Survival Pre and During Covid-19 Periods in Johannesburg, South**

**Africa.**

Journal name: Breast cancer research and treatment

Authors names: Olaide O. Ojoniyi, Wenlong Carl Chen, Rebaone Petlele, Raylton P. Chikwati, Monica E. Akokuwebe, Nivashini Murugan, Phumudzo Ndwambi, Jennifer Edge, Neo Helen Selwane, Alfred I Neugut, Herbert Cubasch, Paul Ruff, Shane A. Norris

Corresponding author: Dr Maureen Joffe: email mjoffe@witshealth.co.za

**Supplementary Table 1: Factors associated with BC stage at diagnosis among study cohorts pre-COVID stratified by risk domain.**

| **Period of enrolment** | **Model 1** | **Model 2** | **Model 3** | **Model 4** | **Model 5** |
| --- | --- | --- | --- | --- | --- |
| **Variables** | **OR (95%CI) P-value** | **OR (95%CI) P-value** | **OR (95%CI) P-value** | **OR (95%CI) P-value** | **OR (95%CI) P-value** |
| **Enrolment hospital** |  |  |  |  |  |
| CHBAH | 1 (ref) |  |  |  |  |
| CMJAH | **1.75(1.34-2.27) <0.01** |  |  |  |  |
| **Household & sociodemographic risk** |  |  |  |  |  |
| **Social support** |  |  |  |  |  |
| In a relationship |  | 1 (ref) |  |  |  |
| Single (including divorced and widowed) |  | 0.97(0.74-1.27) 0.81 |  |  |  |
| **Employment status** |  |  |  |  |  |
| Employed |  | 1 (ref) |  |  |  |
| Unemployed (including retired and students) |  | 1.15(0.86-1.54) 0.35 |  |  |  |
| **Education level** |  |  |  |  |  |
| Secondary or higher |  | 1 (ref) |  |  |  |
| Primary school or less (R0/G7+informal) |  | 1.09(0.79-1.50) 0.58 |  |  |  |
| **Household Wealth** |  |  |  |  |  |
| High wealth index score |  | 1 (ref) |  |  |  |
| Low to Mid wealth index score (0-3) |  | **1.48(1.13-1.94) <0.01** |  |  |  |
| **Family member diagnosed with cancer:** |  |  |  |  |  |
| No |  | 1 (ref) |  |  |  |
| Yes |  | 0.68(0.46-1.01) 0.06 |  |  |  |
| **Knowledge of breast cancer** |  |  |  |  |  |
| Good (score 6-7) |  | 1 (ref) |  |  |  |
| Poor to intermediate (score 0-5) |  | 1.00(0.99-1.00) 0.96 |  |  |  |
| **Distance from Residence to Hospital (km):** |  | 1.00(0.99-1.00) 0.35 |  |  |  |
| **Multi-morbidity burden:** |  | 0.92(0.67-1.20) 0.53 |  |  |  |
| **Delays before Presenting to Hospital(days)** |  | 1.00(0.99-1.00) 0.72 |  |  |  |
| **Behavioral risk** |  |  |  |  |  |
| **Tobacco smoking:** |  |  |  |  |  |
| No |  |  | 1 (ref) |  |  |
| Yes |  |  | 0.85(0.58-1.24) 0.40 |  |  |
| **Clinical risks** |  |  |  |  |  |
| **HIV status at time of breast cancer diagnosis:** |  |  |  |  |  |
| Negative |  |  |  | 1 (ref) |  |
| Positive |  |  |  | 0.98(0.72-1.34) 0.92 |  |
| **Age at diagnosis:** |  |  |  |  | **0.99(0.98-1.00) 0.03** |

Ref = reference category, 95% CI in parenthesis, **significant p-value (<0.05)** shown in bold face

Abbreviations: CI = Confidence Interval; CHBAH = Chris Hani Baragwanath Academic Hospital; CMJAH = Charlotte Maxeke Johannesburg Academic Hospital
