# Supplementary material for: A Comparison of Factors Associated with Breast Cancer Stage at Diagnosis and 2-year Overall Survival Pre and During Covid-19 Periods in Johannesburg, South Africa
Source: Research Square preprint supplement (doi:10.21203/rs.3.rs-8707717/v1), 2026-02-11
Supplement: Supplementary file 2 [file d2658e46761b2d3a65e5d84c.docx]

**A Comparison of Factors Associated with Breast Cancer Stage at Diagnosis and 2-year Overall Survival Pre and During Covid-19 Periods in Johannesburg, South**

**Africa.**

Journal name: Breast cancer research and treatment

Authors names: Olaide O. Ojoniyi, Wenlong Carl Chen, Rebaone Petlele, Raylton P. Chikwati, Monica E. Akokuwebe, Nivashini Murugan, Phumudzo Ndwambi, Jennifer Edge, Neo Helen Selwane, Alfred I Neugut, Herbert Cubasch, Paul Ruff, Shane A. Norris

Corresponding author: Dr Maureen Joffe: email mjoffe@witshealth.co.za

**Supplementary Table 2: Factors associated with BC stage at diagnosis among study cohorts during COVID stratified by risk domain.**

| **Period of enrolment** | **Model 1** | **Model 2** | **Model 3** | **Model 4** | **Model 5** |
| --- | --- | --- | --- | --- | --- |
| **Variables** | **OR (95%CI) P-value** | **OR (95%CI) P-value** | **OR (95%CI) P-value** | **OR (95%CI) P-value** | **OR (95%CI) P-value** |
| **Enrolment hospital** |  |  |  |  |  |
| CHBAH | 1 (ref) |  |  |  |  |
| CMJAH | **1.47(1.05-2.05) 0.02** |  |  |  |  |
| **Household & sociodemographic** |  |  |  |  |  |
| **Social support** |  |  |  |  |  |
| In a relationship |  | 1 (ref) |  |  |  |
| Single (including divorced and widowed) |  | **1.58(1.16-2.16) <0.01** |  |  |  |
| **Employment status** |  |  |  |  |  |
| Employed |  | 1 (ref) |  |  |  |
| Unemployed (including retired and students) |  | 1.26(0.89-1.78) 0.20 |  |  |  |
| **Education level** |  |  |  |  |  |
| Secondary or higher |  | 1 (ref) |  |  |  |
| Primary school or less (R0/G7+informal) |  | 1.16(0.77-1.76) 0.47 |  |  |  |
| **Household poverty** |  |  |  |  |  |
| High wealth index score |  | 1 (ref) |  |  |  |
| Low to Mid wealth index score (0-3) |  | 1.24(0.91-1.69) 0.16 |  |  |  |
| **Family member diagnosed with cancer:** |  |  |  |  |  |
| No |  | 1 (ref) |  |  |  |
| Yes |  | **0.51(0.33-0.80) <0.01** |  |  |  |
| **Knowledge of breast cancer** |  |  |  |  |  |
| Good (score 6-7) |  | 1 (ref) |  |  |  |
| Poor to intermediate (score 0-5) |  | 0.79(0.57-1.09) 0.15 |  |  |  |
| **Distance from Residence to Hospital (km):** |  | 1.00(0.99-1.01) 0.58 |  |  |  |
| **Multi-morbidity burden:** |  | **0.73(0.53-0.99) 0.05** |  |  |  |
| **Delays before Presenting to Hospital(days)** |  | 1.00(0.99-1.00) 0.08 |  |  |  |
| **Behavioral risk** |  |  |  |  |  |
| **Tobacco smoking:** |  |  |  |  |  |
| No |  |  | 1 (ref) |  |  |
| Yes |  |  | 0.65(0.40-1.06) 0.08 |  |  |
| **Clinical risks** |  |  |  |  |  |
| **HIV status at time of breast cancer diagnosis:** |  |  |  |  |  |
| Negative |  |  |  | 1 (ref) |  |
| Positive |  |  |  | 1.00(0.99-1.01) 0.55 |  |
| **Age at diagnosis:** |  |  |  |  | 1.00(0.99-1.01) 0.52 |

Ref = reference category, 95% CI in parenthesis, **significant p-value (<0.05)** shown in bold face

Abbreviations: CI = Confidence Interval; CHBAH = Chris Hani Baragwanath Academic Hospital; CMJAH = Charlotte Maxeke Johannesburg Academic Hospital
