# Supplementary material for: A Comparison of Factors Associated with Breast Cancer Stage at Diagnosis and 2-year Overall Survival Pre and During Covid-19 Periods in Johannesburg, South Africa
Source: Research Square preprint supplement (doi:10.21203/rs.3.rs-8707717/v1), 2026-02-11
Supplement: Supplementary file 3 [file e476b1747f6488f0729760b6.docx]

**A Comparison of Factors Associated with Breast Cancer Stage at Diagnosis and 2-year Overall Survival Pre and During Covid-19 Periods in Johannesburg, South**

**Africa.**

Journal name: Breast cancer research and treatment

Authors names: Olaide O. Ojoniyi, Wenlong Carl Chen, Rebaone Petlele, Raylton P. Chikwati, Monica E. Akokuwebe, Nivashini Murugan, Phumudzo Ndwambi, Jennifer Edge, Neo Helen Selwane, Alfred I Neugut, Herbert Cubasch, Paul Ruff, Shane A. Norris

Corresponding author: Dr Maureen Joffe: email mjoffe@witshealth.co.za

**Supplementary Table 3: Cox Proportional Hazards Regression on 2-year Overall Survival and Associated Risk Factors by risk domain, pre-COVID.**

|  | **Model 1** | **Model 2** | **Model 3** | **Model 4** | **Model 5** | **Model 6** |
| --- | --- | --- | --- | --- | --- | --- |
| **Variables** | **HR (95%CI) P-value** | **HR (95%CI) P-value** | **HR (95%CI) P-value** | **HR (95%CI) P-value** | **HR (95%CI) P-value** | **HR (95%CI) P-value** |
| **Enrolment hospital** |  |  |  |  |  |  |
| CHBAH | 1 (ref) |  |  |  |  |  |
| CMJAH | 1.14(0.96-1.35) 0.13 |  |  |  |  |  |
| **Household & sociodemographic risk** |  |  |  |  |  |  |
| **Social support** |  |  |  |  |  |  |
| In a relationship |  | 1 (ref) |  |  |  |  |
| Single (including divorced and widowed) |  | 1.06(0.89-1.26) 0.54 |  |  |  |  |
| **Employment status** |  |  |  |  |  |  |
| Employed |  | 1 (ref) |  |  |  |  |
| Unemployed (including retired and students) |  | **1.32(1.08-1.61) 0.01** |  |  |  |  |
| **Education level** |  |  |  |  |  |  |
| Secondary or higher |  | 1 (ref) |  |  |  |  |
| Primary school or less (R0/G7+informal) |  | **1.34(1.10-1.64) <0.01** |  |  |  |  |
| **Household poverty** |  |  |  |  |  |  |
| High wealth index score |  | 1 (ref) |  |  |  |  |
| Low to Mid wealth index score (0-3) |  | 1.04(0.87-1.24) 0.69 |  |  |  |  |
| **Family member diagnosed with cancer:** |  |  |  |  |  |  |
| No |  | 1 (ref) |  |  |  |  |
| Yes |  | 0.77(0.59-1.02) 0.07 |  |  |  |  |
| **Knowledge of breast cancer** |  |  |  |  |  |  |
| Good (score 6-7) |  | 1 (ref) |  |  |  |  |
| Poor to intermediate (score 0-5) |  | **0.80(0.67-0.96) 0.02** |  |  |  |  |
| **Distance from Residence to Hospital (km)** |  | 0.99(0.99-1.00) 0.39 |  |  |  |  |
| **Multi-morbidity burden:** |  | 0.91(0.76-1.09) 0.30 |  |  |  |  |
| **Behavioural risk** |  |  |  |  |  |  |
| **Tobacco smoking:** |  |  |  |  |  |  |
| No |  |  | 1 (ref) |  |  |  |
| Yes |  |  | 1.08(0.84-1.38) 0.55 |  |  |  |
| **Clinical risks** |  |  |  |  |  |  |
| **HIV status at time of breast cancer diagnosis:** |  |  |  |  |  |  |
| Negative |  |  |  | 1 (ref) |  |  |
| Positive |  |  |  | **1.37(1.12-1.67) <0.01** |  |  |
| **Stage at diagnosis:** |  |  |  |  |  |  |
| Stage 1 + 2 |  |  |  | 1 (ref) |  |  |
| Stage 3 + 4 |  |  |  | **3.05(2.52-3.69) <0.01** |  |  |
| **Cancer proliferation risk:** |  |  |  |  |  |  |
| Low: Ki67<20% |  |  |  | 1 (ref) |  |  |
| High: Ki67≥20% |  |  |  | **1.25(1.02-1.53) 0.03** |  |  |
| **Receptor subtype risk** |  |  |  |  |  |  |
| HR+/HER2- |  |  |  | 1 (ref) |  |  |
| HR+/HER2+ |  |  |  | **1.28(1.02-1.59) 0.03** |  |  |
| HR-/HER2+ |  |  |  | 1.19(0.85-1.67) 0.30 |  |  |
| HR-/HER2- |  |  |  | 1.17(0.92-1.49) 0.20 |  |  |
| **Treatment risks** |  |  |  |  |  |  |
| **First Treatment** |  |  |  |  |  |  |
| Surgery |  |  |  |  | 1 (ref) |  |
| No Treatment |  |  |  |  | **6.50(4.98-8.49) <0.01** |  |
| Endocrine |  |  |  |  | **3.33(2.41-4.61) <0.01** |  |
| NACT |  |  |  |  | **2.78(2.26-3.41) <0.01** |  |
| **Age at diagnosis:** |  |  |  |  |  | **1.01(1.00-1.01) 0.03** |

Ref = reference category, 95% CI in parenthesis, **significant p-value (<0.05)** shown in bold face

Abbreviations: CI = Confidence Interval; CHBAH = Chris Hani Baragwanath Academic Hospital; CMJAH = Charlotte Maxeke Johannesburg Academic Hospital
