# Supplementary material for: A Comparison of Factors Associated with Breast Cancer Stage at Diagnosis and 2-year Overall Survival Pre and During Covid-19 Periods in Johannesburg, South Africa
Source: Research Square preprint supplement (doi:10.21203/rs.3.rs-8707717/v1), 2026-02-11
Supplement: Supplementary file 4 [file f5365c6bd585c0d931fd2935.docx]

**A Comparison of Factors Associated with Breast Cancer Stage at Diagnosis and 2-year Overall Survival Pre and During Covid-19 Periods in Johannesburg, South**

**Africa.**

Journal name: Breast cancer research and treatment

Authors names: Olaide O. Ojoniyi, Wenlong Carl Chen, Rebaone Petlele, Raylton P. Chikwati, Monica E. Akokuwebe, Nivashini Murugan, Phumudzo Ndwambi, Jennifer Edge, Neo Helen Selwane, Alfred I Neugut, Herbert Cubasch, Paul Ruff, Shane A. Norris

Corresponding author: Dr Maureen Joffe: email mjoffe@witshealth.co.za

**Supplementary Table 4: Cox Proportional Hazards Regression on 2-year Overall Survival and Associated Risk Factors during COVID by risk domain.**

|  | **Model 1** | **Model 2** | **Model 3** | **Model 4** | **Model 5** | **Model 6** |
| --- | --- | --- | --- | --- | --- | --- |
| **Variables** | **HR (95%CI) P-value** | **HR (95%CI) P-value** | **HR (95%CI) P-value** | **HR (95%CI) P-value** | **HR (95%CI) P-value** | **HR (95%CI) P-value** |
| **Enrolment hospital** |  |  |  |  |  |  |
| CHBAH | 1 (ref) |  |  |  |  |  |
| CMJAH | 1.09(0.86-1.37) 0.48 |  |  |  |  |  |
| **Household & sociodemographic** |  |  |  |  |  |  |
| **Minimal social support** |  |  |  |  |  |  |
| In a relationship |  | 1 (ref) |  |  |  |  |
| Single (including divorced and widowed) |  | **1.27(1.02-1.60) 0.03** |  |  |  |  |
| **Employment status** |  |  |  |  |  |  |
| Employed |  | 1 (ref) |  |  |  |  |
| Unemployed (including retired and students) |  | **1.57(1.20-2.07) <0.01** |  |  |  |  |
| **Education level** |  |  |  |  |  |  |
| Secondary or higher |  | 1 (ref) |  |  |  |  |
| Primary school or less (R0/G7+informal) |  | 1.16(0.88-1.52) 0.29 |  |  |  |  |
| **Household poverty** |  |  |  |  |  |  |
| High wealth index score |  | 1 (ref) |  |  |  |  |
| Low to Mid wealth index score (0-3) |  | 1.05(0.85-1.31) 0.65 |  |  |  |  |
| **Family member diagnosed with cancer:** |  |  |  |  |  |  |
| No |  | 1 (ref) |  |  |  |  |
| Yes |  | 0.88(0.62-1.24) 0.46 |  |  |  |  |
| **Knowledge of breast cancer** |  |  |  |  |  |  |
| Good (score 6-7) |  | 1 (ref) |  |  |  |  |
| Poor to intermediate (score 0-5) |  | 0.87(0.70-1.09) 0.23 |  |  |  |  |
| **Distance from Residence to Hospital (km)** |  | 1.00(0.99-1.00) 0.67 |  |  |  |  |
| **Multi-morbidity burden:** |  | 0.90(0.73-1.12) 0.35 |  |  |  |  |
| **Behavioral risk** |  |  |  |  |  |  |
| **Tobacco smoking:** |  |  |  |  |  |  |
| No |  |  | 1 (ref) |  |  |  |
| Yes |  |  | 1.20(0.85-1.68) 0.30 |  |  |  |
| **Clinical risks** |  |  |  |  |  |  |
| **HIV status at breast cancer diagnosis:** |  |  |  |  |  |  |
| Negative |  |  |  | 1 (ref) |  |  |
| Positive |  |  |  | 1.08(0.85-1.37) 0.54 |  |  |
| **Stage at diagnosis:** |  |  |  |  |  |  |
| Stage 1 + 2 |  |  |  | 1 (ref) |  |  |
| Stage 3 + 4 |  |  |  | **2.70(2.08-3.52) <0.01** |  |  |
| **Cancer proliferation risk:** |  |  |  |  |  |  |
| Low: Ki67<20% |  |  |  | 1 (ref) |  |  |
| High: Ki67≥20% |  |  |  | **1.41(1.04-1.91) 0.02** |  |  |
| **Receptor subtype risk** |  |  |  |  |  |  |
| HR+/HER2- |  |  |  | 1 (ref) |  |  |
| HR+/HER2+ |  |  |  | 1.34(1.00-1.81) 0.05 |  |  |
| HR-/HER2+ |  |  |  | **1.85(1.25-2.74) <0.01** |  |  |
| HR-/HER2- |  |  |  | **1.58(1.19-2.09) <0.01** |  |  |
| **First Treatment initiated** |  |  |  |  |  |  |
| Surgery |  |  |  |  | 1 (ref) |  |
| No Treatment |  |  |  |  | **14.51(10.12-20.80) <0.01** |  |
| Endocrine |  |  |  |  | **4.38(2.97-6.46) <0.01** |  |
| NACT |  |  |  |  | **3.10(2.25-4.27) <0.01** |  |
| Palliative DXT |  |  |  |  | **11.16(4.01-31.03) <0.01** |  |
| **Age at diagnosis:** |  |  |  |  |  | **1.01(1.00-1.02) 0.02** |

Ref = reference category, 95% CI in parenthesis, **significant p-value (<0.05)** shown in bold face

Abbreviations: CI = Confidence Interval; CHBAH = Chris Hani Baragwanath Academic Hospital; CMJAH = Charlotte Maxeke Johannesburg Academic Hospital
